# Supplementary material
Source: PubMed Central journal article supplement (PMC7202947)

Figure S1

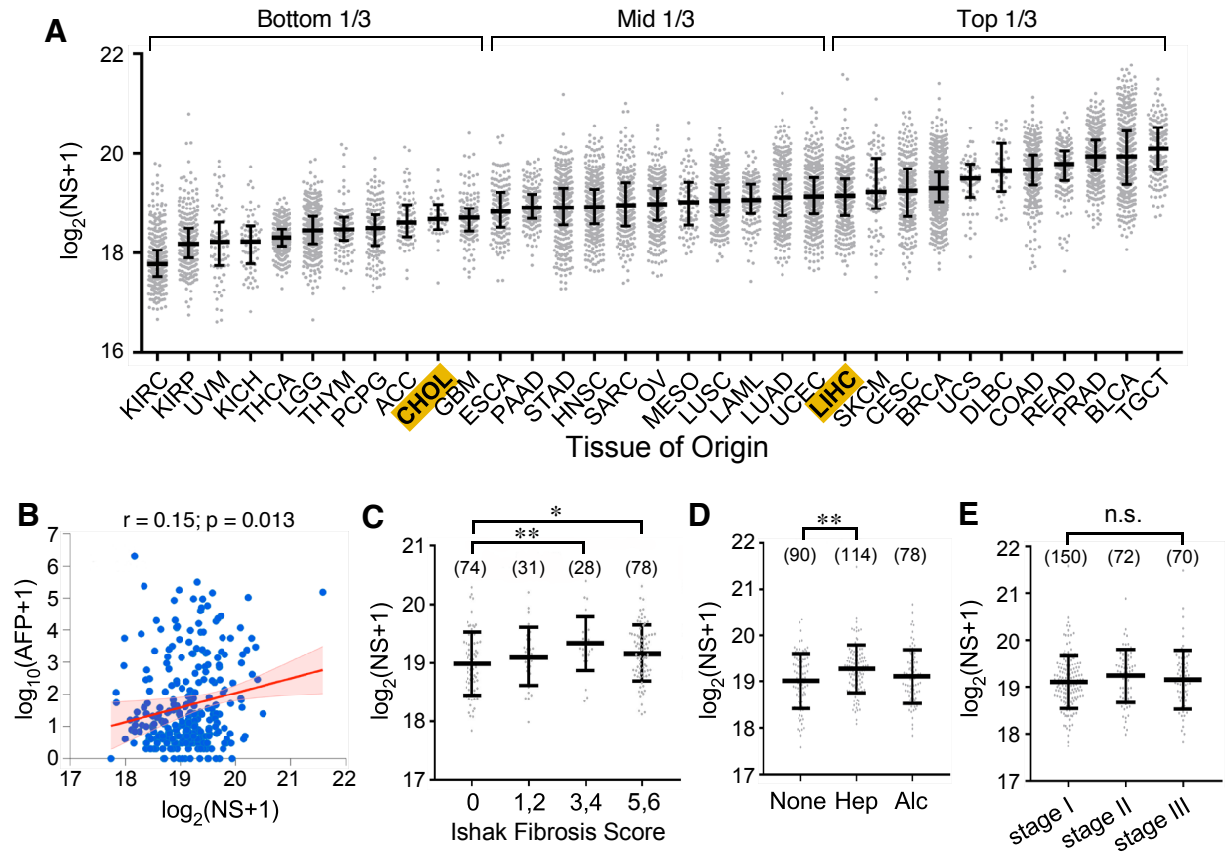

Figure S2

**A**

**Univariate (log-rank)**

|                                          | OS          |                  |      | PFS         |                  |      |
|------------------------------------------|-------------|------------------|------|-------------|------------------|------|
|                                          | Haz         | p                | Size | Haz         | p                | Size |
| KIRC (kidney renal clear cell carcinoma) | <b>2.19</b> | <b>&lt;0.001</b> | 524  | <b>2.27</b> | <b>&lt;0.001</b> | 522  |
| LIHC (hepatocellular carcinoma)          | <b>1.45</b> | <b>0.029</b>     | 368  | <b>1.44</b> | <b>0.018</b>     | 368  |
| PAAD (pancreatic adenocarcinoma)         | <b>1.63</b> | <b>0.018</b>     | 177  | <b>1.82</b> | <b>0.002</b>     | 177  |
| PRAD (prostate adenocarcinoma)           | 6.29        | 0.037            | 479  | 1.48        | 0.064            | 479  |
| SARC (sarcoma)                           | 1.81        | 0.003            | 258  | 1.35        | 0.072            | 258  |
| LGG (low grade glioma)                   | 0.72        | 0.063            | 497  | 0.71        | 0.019            | 497  |
| ACC (adrenocortical carcinoma)           | 2.30        | 0.034            | 78   | 1.52        | 0.183            | 78   |
| SKCM (skin cutaneous melanoma)           | 1.75        | 0.123            | 103  | 2.59        | 0.005            | 103  |
| BLCA (bladder urothelial carcinoma)      | 0.77        | 0.080            | 403  | 0.62        | 0.002            | 404  |
| COAD (colorectal adenocarcinoma)         | 0.73        | 0.109            | 450  | 0.65        | 0.017            | 450  |
| READ (rectum adenocarcinoma)             | 0.44        | 0.034            | 162  | 0.74        | 0.345            | 162  |

**B**

**Multivariate (Cox)**

|  | OS          |                  | PFS         |              |
|--|-------------|------------------|-------------|--------------|
|  | Haz         | p                | Haz         | p            |
|  | <b>1.97</b> | <b>&lt;0.001</b> | <b>1.72</b> | <b>0.001</b> |
|  | <b>1.51</b> | <b>0.039</b>     | <b>1.61</b> | <b>0.004</b> |
|  | 1.56        | 0.048            | 1.41        | 0.113        |
|  | n.a.        |                  | n.a.        |              |
|  | n.a.        |                  | n.a.        |              |
|  | 0.86        | 0.428            | 0.75        | 0.061        |
|  | 1.87        | 0.110            | 1.82        | 0.059        |
|  | 2.15        | 0.060            | 3.43        | 0.001        |
|  | 0.74        | 0.065            | 0.65        | 0.009        |
|  | 0.70        | 0.109            | 0.67        | 0.051        |
|  | 0.51        | 0.149            | 0.61        | 0.193        |

Figure S3

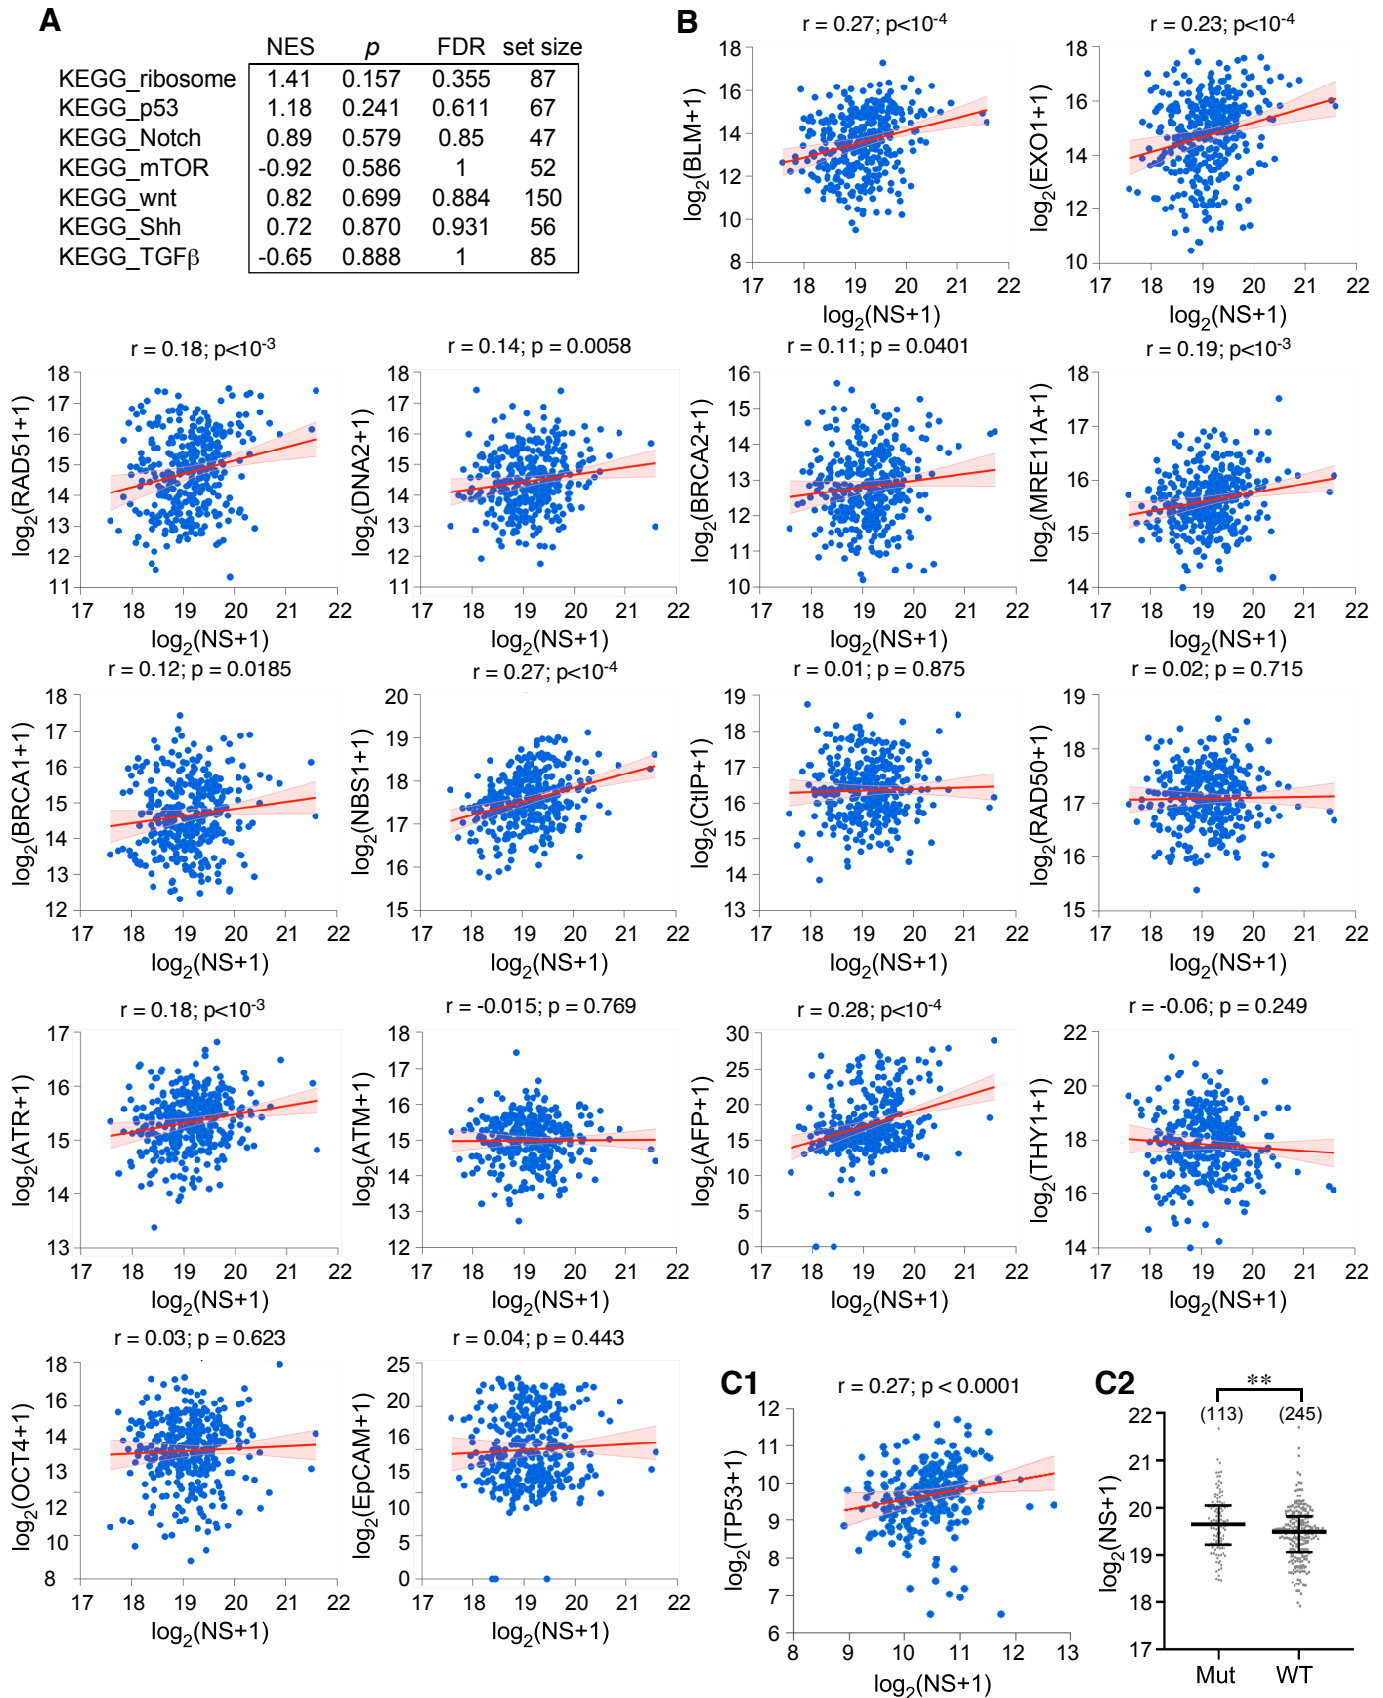

Figure S4

**A**

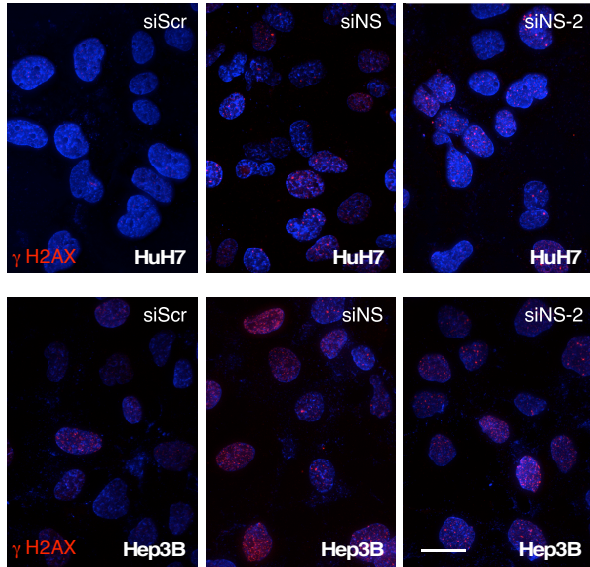

**B**

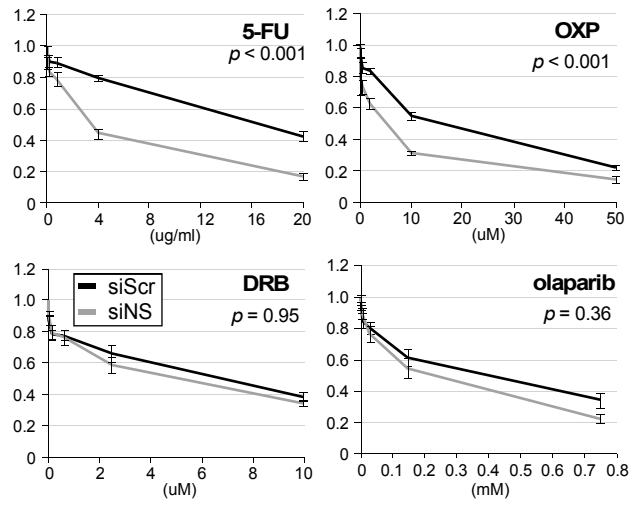

Figure S5

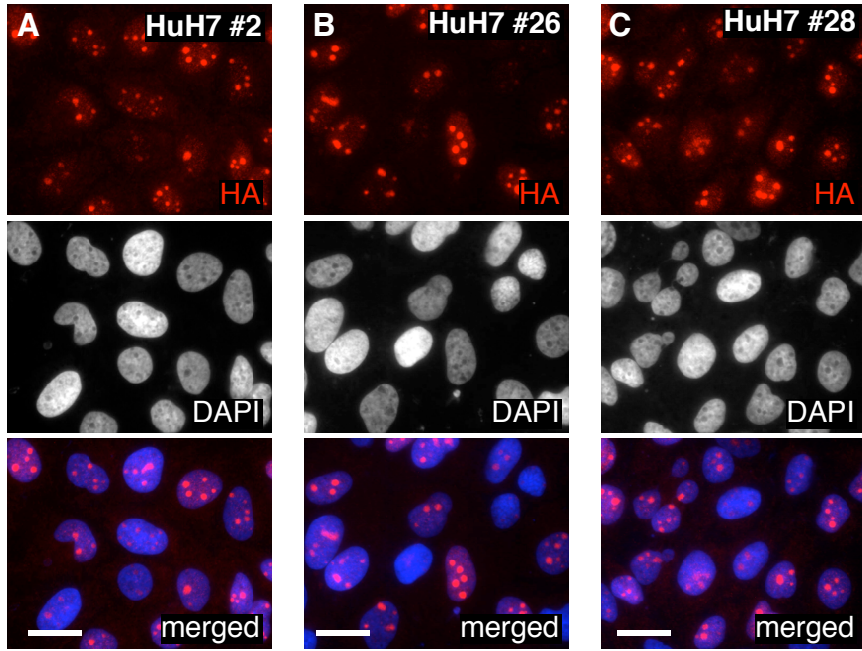

Figure S6

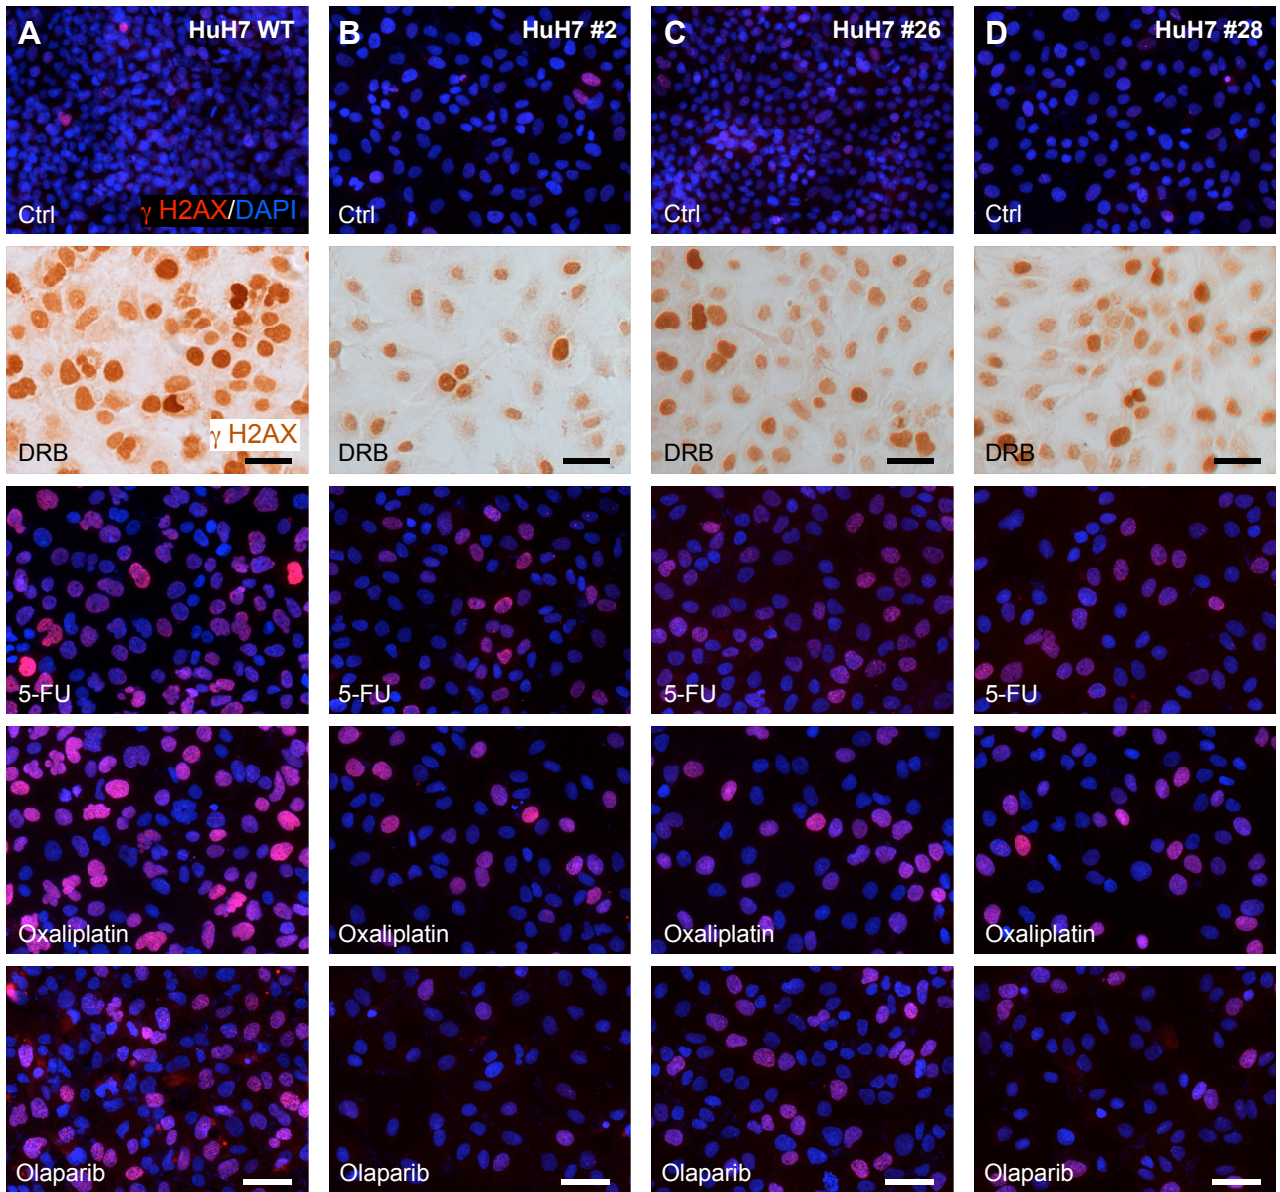

Figure S7

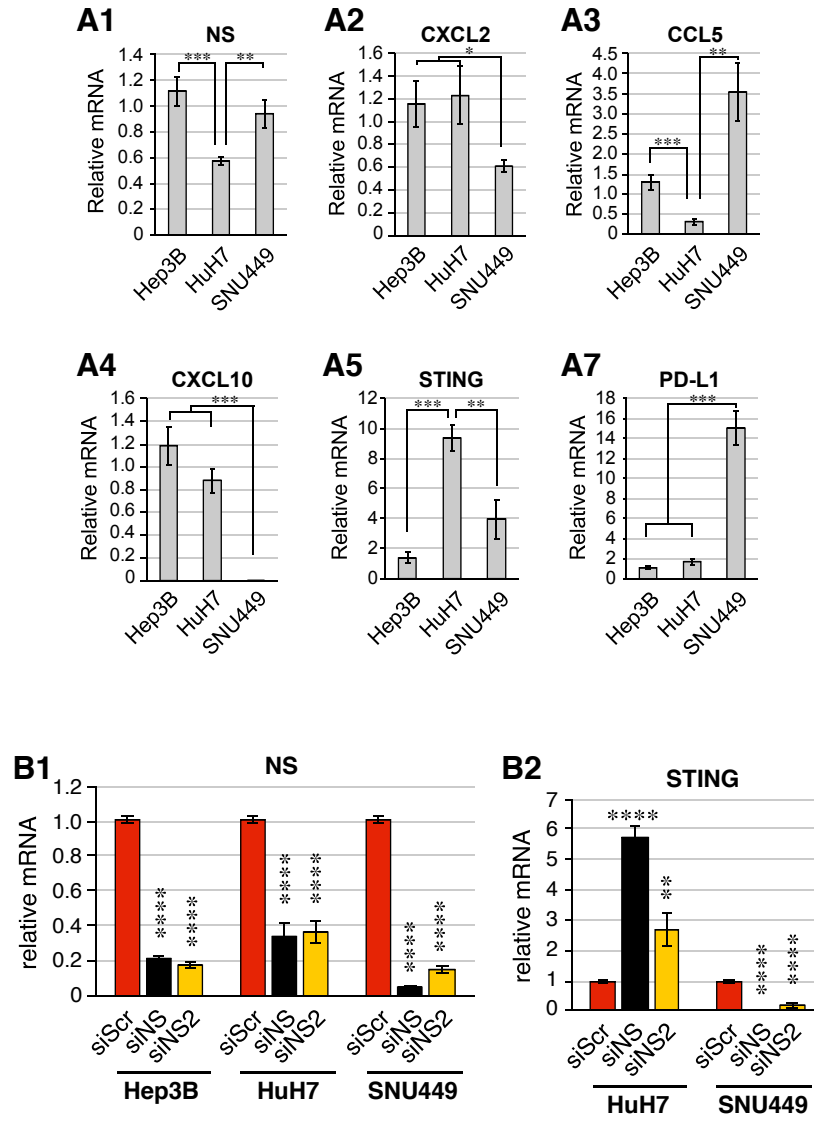

Supplement: NIHMS1560749-supplement-3.pdf [file NIHMS1560749-supplement-3.pdf]
